# Supplementary material for: Metabolic profiling of Candida clinical isolates of different species and infection sources
Source: PubMed Central journal article supplement (PMC7541501; doi:10.1038/s41598-020-73889-1), 2020-10-07
Supplement: 41598_2020_73889_MOESM1_ESM.pdf [file 41598_2020_73889_MOESM1_ESM.pdf]

## **Metabolic profiling of *Candida* clinical isolates of different species and infection sources**

Josidel Conceição Oliver<sup>1,4#</sup>, Luca Laghi<sup>2#</sup>, Carola Parolin<sup>1</sup>, Claudio Foschi<sup>3</sup>, Antonella Marangoni<sup>3</sup>, Andrea Liberatore<sup>3</sup>, Amanda Latercia Tranches Dias<sup>4</sup>, Monica Cricca<sup>3\*</sup>, Beatrice Vitali<sup>1</sup>

<sup>1</sup>Department of Pharmacy and Biotechnology, Alma Mater Studiorum, University of Bologna, Bologna, Italy;

<sup>2</sup>Centre of Foodomics, Department of Agro-Food Science and Technology, Alma Mater Studiorum, University of Bologna, Cesena, Italy;

<sup>3</sup>Microbiology, DIMES, Alma Mater Studiorum, University of Bologna, Bologna, Italy;

<sup>4</sup>Department of Microbiology and Immunology, Federal University of Alfenas, Minas Gerais, Brazil.

## Supplementary information

**Table S1: Infection source and virulence factors of *Candida* strains.**

| Strain number | Acc. Num. (GenBank) | Species                | Source | Biofilm | SAP activity (mm) | Amphoter-B  | Fluconazole | Caspofungin |
|---------------|---------------------|------------------------|--------|---------|-------------------|-------------|-------------|-------------|
| 24            | MT876150            | <i>C. albicans</i>     | R      | 0       | N                 | S (0,03)    | S (1)       | S (0,015)   |
| 25            | MT876145            | <i>C. glabrata</i>     | R      | 1       | N                 | S (0,125)   | R (>32)     | S (0,0625)  |
| 26            | MT876175            | <i>C. albicans</i>     | R      | 3       | N                 | S (0,0625)  | S (0,5)     | S (0,015)   |
| 28            | MT876158            | <i>C. albicans</i>     | R      | 1       | P (12)            | S (0,03)    | R (>32)     | S (0,015)   |
| 29            | MT876184            | <i>C. albicans</i>     | R      | 0       | P (7)             | S (0,03)    | R (>32)     | S (0,015)   |
| 30            | MT876144            | <i>C. tropicalis</i>   | R      | 3       | N                 | S (0,125)   | R (>32)     | S (0,03)    |
| 31            | MT876151            | <i>C. parapsilosis</i> | B      | 2       | P (2)             | S (0,0625)  | S (1)       | I (0,125)   |
| 33            | MT876147            | <i>C. parapsilosis</i> | R      | 1       | P (2)             | S (0,0625)  | I (4)       | S (0,25)    |
| 44            | MT876146            | <i>C. glabrata</i>     | R      | 1       | N                 | S (0,0625)  | R (>32)     | S (0,0625)  |
| 46            | MT876136            | <i>C. glabrata</i>     | R      | 0       | N                 | S (0,125)   | R (>32)     | S (0,0625)  |
| 47            | MT876153            | <i>C. glabrata</i>     | V      | 0       | N                 | S (0,125)   | R (>32)     | S (0,03)    |
| 48            | MT876152            | <i>C. glabrata</i>     | V      | 0       | N                 | S (0,125)   | R (>32)     | S (0,03)    |
| 51            | MT876138            | <i>C. parapsilosis</i> | B      | 2       | N                 | S (0,0625)  | S (0,5)     | S (0,25)    |
| 52            | MT876148            | <i>C. parapsilosis</i> | B      | 2       | N                 | S (<=0,007) | S (<=0,25)  | S (<=0,007) |
| 53            | MT876137            | <i>C. parapsilosis</i> | B      | 3       | P (5)             | S (0,03)    | S (2)       | S (0,25)    |
| 59            | MT876169            | <i>C. albicans</i>     | B      | 2       | P (2)             | S (0,03)    | R (>32)     | S (0,03)    |
| 60            | MT876179            | <i>C. albicans</i>     | B      | 1       | P (3)             | S (0,03)    | S (1)       | S (0,03)    |
| 61            | MT876163            | <i>C. albicans</i>     | B      | 1       | N                 | S (0,03)    | S (0,5)     | S (0,03)    |
| 66            | MT876170            | <i>C. albicans</i>     | B      | 1       | N                 | S (0,03)    | S (1)       | S (0,03)    |
| 67            | MT876154            | <i>C. glabrata</i>     | B      | 2       | N                 | S (0,125)   | R (>32)     | S (0,0625)  |
| 71            | MT876167            | <i>C. albicans</i>     | V      | 2       | N                 | S (<=0,007) | S (<=0,25)  | S (<=0,007) |
| 72            | MT876161            | <i>C. albicans</i>     | V      | 1       | N                 | S (0,03)    | S (0,5)     | S (0,015)   |
| 73            | MT876140            | <i>C. glabrata</i>     | V      | 1       | N                 | S (0,0625)  | R (>32)     | S (0,0625)  |
| 74            | MT876139            | <i>C. glabrata</i>     | V      | 0       | N                 | S (0,03)    | R (>32)     | S (0,0625)  |
| 75            | MT876143            | <i>C. glabrata</i>     | V      | 1       | N                 | S (0,125)   | R (>32)     | S (0,0625)  |
| 76            | MT876142            | <i>C. glabrata</i>     | V      | 0       | N                 | S (0,25)    | R (>32)     | S (0,0625)  |
| 77            | MT876168            | <i>C. albicans</i>     | V      | 1       | P (3)             | S (0,03)    | S (1)       | S (0,015)   |
| 78            | MT876141            | <i>C. albicans</i>     | V      | 0       | P (5)             | S (0,0625)  | S (0,5)     | S (0,015)   |
| 79            | MT876176            | <i>C. albicans</i>     | V      | 0       | N                 | S (0,0625)  | S (0,5)     | S (0,015)   |
| 80            | MT876173            | <i>C. albicans</i>     | B      | 0       | P (2)             | S (0,03)    | S (0,5)     | S (0,015)   |
| 81            | MT876178            | <i>C. albicans</i>     | B      | 0       | N                 | S (0,0625)  | S (1)       | S (0,015)   |
| 83            | MT876156            | <i>C. parapsilosis</i> | B      | 2       | P (2)             | S (0,0625)  | S (1)       | S (0,25)    |
| 85            | MT876165            | <i>C. albicans</i>     | V      | 1       | N                 | S (0,03)    | S (0,5)     | S (0,015)   |
| 86            | MT876159            | <i>C. albicans</i>     | R      | 1       | N                 | S (0,03)    | S (0,5)     | S (0,015)   |
| 87            | MT876166            | <i>C. albicans</i>     | V      | 0       | N                 | S (0,03)    | S (0,5)     | S (0,015)   |
| 88            | MT876160            | <i>C. albicans</i>     | V      | 1       | N                 | S (0,0625)  | S (0,5)     | S (0,015)   |
| 89            | MT876183            | <i>C. albicans</i>     | V      | 0       | P (5)             | S (0,0625)  | R (>32)     | S (0,015)   |
| 91            | MT876162            | <i>C. dubliniensis</i> | R      | 1       | N                 | S (0,015)   | S (<=0,25)  | R (>1)      |
| 92            | MT876149            | <i>C. albicans</i>     | R      | 0       | N                 | S (0,03)    | S (0,5)     | S (0,03)    |
| 93            | MT876172            | <i>C. albicans</i>     | R      | 1       | N                 | S (0,0625)  | S (0,5)     | S (0,03)    |
| 94            | MT876174            | <i>C. albicans</i>     | V      | 0       | P (1)             | S (0,03)    | S (0,5)     | S (0,03)    |
| 95            | MT876164            | <i>C. albicans</i>     | V      | 0       | N                 | S (0,03)    | S (0,5)     | S (0,03)    |
| 96            | MT876181            | <i>C. albicans</i>     | V      | 2       | N                 | S (0,03)    | S (1)       | S (0,015)   |
| 97            | MT876180            | <i>C. albicans</i>     | R      | 2       | P (3)             | S (0,03)    | S (1)       | S (0,015)   |
| 98            | MT876177            | <i>C. albicans</i>     | B      | 2       | P (4)             | S (0,03)    | S (1)       | S (0,015)   |
| 99            | MT876171            | <i>C. albicans</i>     | B      | 2       | P (1)             | S (0,03)    | S (1)       | S (0,015)   |
| 100           | MT876155            | <i>C. tropicalis</i>   | R      | 3       | P (5)             | S (0,125)   | R (>32)     | S (0,03)    |
| 103           | MT876157            | <i>C. tropicalis</i>   | B      | 2       | P (5)             | S (<=0,007) | S (1)       | S (<=0,007) |
| 104           | MT876182            | <i>C. albicans</i>     | R      | 2       | N                 | S (0,0625)  | S (2)       | S (0,03)    |

Source: R=RESPIRATORY SAMPLES; B=BLOOD SAMPLES; V=VAGINAL SWAB

Biofilm formation: 0=NON PRODUCER; 1=WEAK PRODUCER; 2=INTERMEDIATE PRODUCER; 3=STRONG PRODUCER. The activity was measured as absorbance at 595 nm.

SAP activity: N=NON-PRODUCER; P=PRODUCER; In brackets diameter of the visible clear zone around the colony after 1 week of incubation at 37°C in humidified chamber.

Antifungal susceptibility testing (Amphotericin-B, Fluconazole and Caspofungin): S=SUSCEPTIBLE; I=INTERMEDIATE; R=RESISTANT (interpretation following EUCAST antifungal clinical breakpoints); In brackets MIC values.

**Table S2: Concentration (mmol/L, mean  $\pm$  sd) of *Candida* extracellular metabolites significantly different in relation to the source of infection, expressed as difference from growth medium.**

|                      | Respiratory tract                                 | Vagina                                           | Blood                                             |
|----------------------|---------------------------------------------------|--------------------------------------------------|---------------------------------------------------|
| Inosine              | $1.58 \times 10^{-3} \pm 2.42 \times 10^{-3}$ ab  | $2.58 \times 10^{-3} \pm 3.80 \times 10^{-3}$ a  | $5.47 \times 10^{-5} \pm 1.76 \times 10^{-3}$ b * |
| 1,3-Dihydroxyacetone | $1.62 \times 10^{-3} \pm 4.34 \times 10^{-4}$ a   | $1.08 \times 10^{-3} \pm 7.11 \times 10^{-4}$ b  | $1.21 \times 10^{-3} \pm 7.34 \times 10^{-4}$ ab  |
| Hydroxyacetone       | $5.88 \times 10^{-3} \pm 2.83 \times 10^{-3}$ a   | $4.47 \times 10^{-3} \pm 2.46 \times 10^{-3}$ ab | $2.55 \times 10^{-3} \pm 2.52 \times 10^{-3}$ b   |
| Choline              | $-1.62 \times 10^{-2} \pm 2.11 \times 10^{-2}$ ab | $-8.68 \times 10^{-3} \pm 2.09 \times 10^{-2}$ a | $-2.11 \times 10^{-2} \pm 1.10 \times 10^{-2}$ b  |
| Putrescine           | $-2.52 \times 10^{-3} \pm 5.92 \times 10^{-3}$ ab | $-3.71 \times 10^{-3} \pm 6.82 \times 10^{-3}$ b | $4.00 \times 10^{-3} \pm 1.15 \times 10^{-2}$ a   |
| Lysine               | $1.08 \times 10^{-1} \pm 5.24 \times 10^{-2}$ ab  | $1.33 \times 10^{-1} \pm 3.94 \times 10^{-2}$ a  | $7.37 \times 10^{-2} \pm 7.44 \times 10^{-2}$ b   |
| Citrate              | $3.47 \times 10^{-1} \pm 1.24 \times 10^{-1}$ ab  | $4.09 \times 10^{-1} \pm 5.87 \times 10^{-2}$ a  | $3.22 \times 10^{-1} \pm 9.13 \times 10^{-2}$ b   |
| Succinate            | $5.29 \times 10^{-1} \pm 1.78 \times 10^{-1}$ a   | $4.15 \times 10^{-1} \pm 1.87 \times 10^{-1}$ ab | $2.92 \times 10^{-1} \pm 2.16 \times 10^{-1}$ b   |
| Alloisoleucine       | $5.14 \times 10^{-1} \pm 1.63 \times 10^{-1}$ a   | $4.78 \times 10^{-1} \pm 2.51 \times 10^{-1}$ ab | $3.50 \times 10^{-1} \pm 1.92 \times 10^{-1}$ b   |
| Ethanol              | $92.3 \pm 21.9$ a                                 | $87.8 \pm 24.3$ ab                               | $70.2 \pm 33.2$ b                                 |
| 2,3-Butanediol       | $2.64 \times 10^{-1} \pm 1.45 \times 10^{-1}$ a   | $1.78 \times 10^{-1} \pm 7.80 \times 10^{-2}$ ab | $1.68 \times 10^{-1} \pm 1.86 \times 10^{-1}$ b   |
| Isobutyrate          | $1.62 \times 10^{-2} \pm 9.45 \times 10^{-3}$ a   | $6.71 \times 10^{-3} \pm 6.10 \times 10^{-3}$ b  | $1.01 \times 10^{-2} \pm 1.08 \times 10^{-2}$ ab  |

\* Compact letters display of the comparisons between each pair of groups, where two mean values followed by a common superscript are not significantly different.

**Table S3: Concentration (mmol/L, mean  $\pm$  sd) of *Candida* intracellular metabolites significantly different in relation to the source of infection.**

|                 | Respiratory tract                                | Vagina                                          | Blood                                             |
|-----------------|--------------------------------------------------|-------------------------------------------------|---------------------------------------------------|
| ADP             | $2.77 \times 10^{-3} \pm 9.97 \times 10^{-4}$ a  | $1.89 \times 10^{-3} \pm 5.46 \times 10^{-4}$ b | $2.62 \times 10^{-3} \pm 8.93 \times 10^{-4}$ a * |
| NAD             | $6.95 \times 10^{-3} \pm 1.10 \times 10^{-3}$ a  | $5.69 \times 10^{-3} \pm 1.53 \times 10^{-3}$ b | $6.44 \times 10^{-3} \pm 1.58 \times 10^{-3}$ ab  |
| UMP             | $1.22 \times 10^{-2} \pm 2.88 \times 10^{-3}$ a  | $8.40 \times 10^{-3} \pm 2.48 \times 10^{-3}$ b | $1.09 \times 10^{-2} \pm 3.03 \times 10^{-3}$ a   |
| Uracil          | $7.97 \times 10^{-3} \pm 1.93 \times 10^{-3}$ a  | $6.16 \times 10^{-3} \pm 1.42 \times 10^{-3}$ b | $6.76 \times 10^{-3} \pm 1.90 \times 10^{-3}$ ab  |
| Creatinine      | $5.72 \times 10^{-3} \pm 2.57 \times 10^{-3}$ ab | $7.29 \times 10^{-3} \pm 3.58 \times 10^{-3}$ a | $4.64 \times 10^{-3} \pm 2.21 \times 10^{-3}$ b   |
| Lysine          | $4.86 \times 10^{-2} \pm 2.05 \times 10^{-2}$ ab | $3.41 \times 10^{-2} \pm 1.16 \times 10^{-2}$ b | $6.06 \times 10^{-2} \pm 4.78 \times 10^{-2}$ a   |
| Aspartate       | $5.43 \times 10^{-2} \pm 2.13 \times 10^{-2}$ a  | $3.45 \times 10^{-2} \pm 1.86 \times 10^{-2}$ b | $4.07 \times 10^{-2} \pm 2.13 \times 10^{-2}$ ab  |
| Pyruvate        | $1.91 \times 10^{-2} \pm 1.01 \times 10^{-2}$ a  | $2.90 \times 10^{-2} \pm 1.17 \times 10^{-2}$ b | $2.01 \times 10^{-2} \pm 1.33 \times 10^{-2}$ a   |
| 2-Aminobutyrate | $4.86 \times 10^{-3} \pm 1.47 \times 10^{-3}$ ab | $4.50 \times 10^{-3} \pm 1.06 \times 10^{-3}$ b | $5.61 \times 10^{-3} \pm 1.52 \times 10^{-3}$ a   |

\* Compact letters display of the comparisons between each pair of groups, where two mean values followed by a common superscript are not significantly different.

**Table S4: Concentration (mmol/L, mean  $\pm$  sd) of extracellular metabolites significantly different in relation to *Candida* species, expressed as difference from growth medium.**

|               | <i>C. albicans</i> complex                        | <i>C. glabrata</i>                                | <i>C. parapsilosis</i>                           | <i>C. tropicalis</i>                             |
|---------------|---------------------------------------------------|---------------------------------------------------|--------------------------------------------------|--------------------------------------------------|
| Phenylalanine | $6.15 \times 10^{-2} \pm 2.43 \times 10^{-2}$ a * | $-7.18 \times 10^{-3} \pm 3.67 \times 10^{-2}$ bc | $-3.63 \times 10^{-2} \pm 4.10 \times 10^{-2}$ c | $3.62 \times 10^{-2} \pm 1.82 \times 10^{-2}$ ab |
| Tyrosine      | $3.01 \times 10^{-2} \pm 7.80 \times 10^{-3}$ b   | $4.57 \times 10^{-2} \pm 1.70 \times 10^{-2}$ a   | $2.25 \times 10^{-2} \pm 8.14 \times 10^{-3}$ b  | $3.88 \times 10^{-2} \pm 6.31 \times 10^{-3}$ ab |
| Fumarate      | $3.34 \times 10^{-2} \pm 1.39 \times 10^{-2}$ a   | $1.18 \times 10^{-2} \pm 4.53 \times 10^{-3}$ b   | $8.29 \times 10^{-3} \pm 2.76 \times 10^{-3}$ b  | $1.43 \times 10^{-2} \pm 5.05 \times 10^{-3}$ b  |
| Orotate       | $1.36 \times 10^{-3} \pm 6.07 \times 10^{-4}$ ab  | $1.91 \times 10^{-3} \pm 6.47 \times 10^{-4}$ a   | $1.22 \times 10^{-3} \pm 7.66 \times 10^{-4}$ ab | $7.68 \times 10^{-4} \pm 7.04 \times 10^{-4}$ b  |
| Inosine       | $3.73 \times 10^{-4} \pm 1.36 \times 10^{-3}$ b   | $6.40 \times 10^{-3} \pm 2.55 \times 10^{-3}$ a   | $-2.93 \times 10^{-4} \pm 1.30 \times 10^{-3}$ b | $-2.45 \times 10^{-4} \pm 8.16 \times 10^{-4}$ b |
| Cytidine      | $-1.06 \times 10^{-3} \pm 1.57 \times 10^{-3}$ b  | $4.78 \times 10^{-3} \pm 2.40 \times 10^{-3}$ a   | $3.12 \times 10^{-3} \pm 2.07 \times 10^{-3}$ a  | $-2.84 \times 10^{-3} \pm 8.72 \times 10^{-5}$ b |
| Guanosine     | $-1.77 \times 10^{-3} \pm 1.26 \times 10^{-3}$ b  | $3.62 \times 10^{-3} \pm 1.63 \times 10^{-3}$ a   | $1.92 \times 10^{-3} \pm 1.36 \times 10^{-3}$ a  | $-3.53 \times 10^{-3} \pm 1.30 \times 10^{-3}$ b |
| Uracil        | $5.66 \times 10^{-3} \pm 2.19 \times 10^{-3}$ b   | $-8.81 \times 10^{-4} \pm 1.55 \times 10^{-3}$ c  | $3.97 \times 10^{-3} \pm 2.39 \times 10^{-3}$ b  | $3.77 \times 10^{-2} \pm 7.51 \times 10^{-3}$ a  |
| Sucrose       | $1.48 \times 10^{-2} \pm 3.69 \times 10^{-3}$ b   | $2.14 \times 10^{-2} \pm 3.80 \times 10^{-3}$ a   | $1.55 \times 10^{-2} \pm 4.24 \times 10^{-3}$ b  | $-2.51 \times 10^{-2} \pm 1.50 \times 10^{-2}$ c |

|                      |                                                  |                                                  |                                                  |                                                  |
|----------------------|--------------------------------------------------|--------------------------------------------------|--------------------------------------------------|--------------------------------------------------|
| Ribose               | $-6.65 \times 10^{-2} \pm 2.22 \times 10^{-2b}$  | $-7.65 \times 10^{-2} \pm 1.80 \times 10^{-2b}$  | $-3.40 \times 10^{-2} \pm 2.03 \times 10^{-2a}$  | $-9.61 \times 10^{-2} \pm 1.65 \times 10^{-3c}$  |
| Mannose              | $2.04 \times 10^{-2} \pm 1.67 \times 10^{-2b}$   | $3.09 \times 10^{-3} \pm 2.16 \times 10^{-2c}$   | $6.33 \times 10^{-2} \pm 1.83 \times 10^{-2a}$   | $-1.28 \times 10^{-2} \pm 9.88 \times 10^{-3c}$  |
| 1,3-Dihydroxyacetone | $1.34 \times 10^{-3} \pm 6.26 \times 10^{-4ab}$  | $9.86 \times 10^{-4} \pm 6.68 \times 10^{-4b}$   | $1.19 \times 10^{-3} \pm 7.52 \times 10^{-4ab}$  | $2.17 \times 10^{-3} \pm 1.43 \times 10^{-4a}$   |
| Hydroxyacetone       | $4.30 \times 10^{-3} \pm 2.16 \times 10^{-3ab}$  | $6.39 \times 10^{-3} \pm 3.54 \times 10^{-3a}$   | $8.63 \times 10^{-4} \pm 1.50 \times 10^{-3b}$   | $4.94 \times 10^{-3} \pm 3.39 \times 10^{-3ab}$  |
| Threonine            | $-4.38 \times 10^{-1} \pm 5.81 \times 10^{-2ab}$ | $-3.99 \times 10^{-1} \pm 7.82 \times 10^{-2ab}$ | $-3.74 \times 10^{-1} \pm 5.89 \times 10^{-2a}$  | $-4.74 \times 10^{-1} \pm 2.00 \times 10^{-3b}$  |
| Lactate              | $6.56 \times 10^{-2} \pm 7.36 \times 10^{-2a}$   | $6.38 \times 10^{-3} \pm 3.40 \times 10^{-2ab}$  | $7.74 \times 10^{-2} \pm 6.79 \times 10^{-2a}$   | $1.62 \times 10^{-2} \pm 1.54 \times 10^{-2ab}$  |
| Arabinitol           | $1.85 \times 10^{+0} \pm 1.13 \times 10^{+0a}$   | $-3.83 \times 10^{-2} \pm 2.98 \times 10^{-2b}$  | $2.61 \times 10^{+0} \pm 1.52 \times 10^{+0a}$   | $1.21 \times 10^{+0} \pm 7.46 \times 10^{-1a}$   |
| Methanol             | $-5.15 \times 10^{-3} \pm 3.64 \times 10^{-3a}$  | $-3.79 \times 10^{-3} \pm 2.98 \times 10^{-3a}$  | $-1.01 \times 10^{-2} \pm 1.02 \times 10^{-3b}$  | $-2.74 \times 10^{-3} \pm 2.35 \times 10^{-3a}$  |
| Glucose              | $-3.28 \times 10^{+1} \pm 9.90 \times 10^{+0ab}$ | $-3.77 \times 10^{+1} \pm 8.34 \times 10^{+0bc}$ | $-1.92 \times 10^{+1} \pm 9.73 \times 10^{+0a}$  | $-4.57 \times 10^{+1} \pm 5.77 \times 10^{-2c}$  |
| Choline              | $-2.11 \times 10^{-2} \pm 6.70 \times 10^{-3b}$  | $1.56 \times 10^{-2} \pm 2.02 \times 10^{-2a}$   | $-2.96 \times 10^{-2} \pm 1.25 \times 10^{-3c}$  | $-2.55 \times 10^{-2} \pm 4.36 \times 10^{-4bc}$ |
| Putrescine           | $-1.24 \times 10^{-3} \pm 9.69 \times 10^{-3ab}$ | $-5.48 \times 10^{-3} \pm 6.45 \times 10^{-3b}$  | $6.12 \times 10^{-3} \pm 3.19 \times 10^{-3a}$   | $2.73 \times 10^{-3} \pm 2.86 \times 10^{-3ab}$  |
| Lysine               | $1.32 \times 10^{-1} \pm 3.71 \times 10^{-2a}$   | $1.08 \times 10^{-1} \pm 2.87 \times 10^{-2a}$   | $-7.73 \times 10^{-3} \pm 7.00 \times 10^{-2b}$  | $7.49 \times 10^{-2} \pm 2.35 \times 10^{-2a}$   |
| Asparagine           | $-1.64 \times 10^{-1} \pm 2.16 \times 10^{-2b}$  | $-1.15 \times 10^{-1} \pm 3.85 \times 10^{-2a}$  | $-1.62 \times 10^{-1} \pm 1.01 \times 10^{-2b}$  | $-1.73 \times 10^{-1} \pm 5.20 \times 10^{-3b}$  |
| Sarcosine            | $1.17 \times 10^{-3} \pm 3.69 \times 10^{-3a}$   | $-1.05 \times 10^{-2} \pm 3.79 \times 10^{-3b}$  | $5.46 \times 10^{-4} \pm 2.95 \times 10^{-3a}$   | $-3.23 \times 10^{-3} \pm 4.83 \times 10^{-3a}$  |
| Malate               | $-1.52 \times 10^{-2} \pm 2.62 \times 10^{-2b}$  | $3.33 \times 10^{-2} \pm 2.85 \times 10^{-2a}$   | $-3.81 \times 10^{-2} \pm 2.32 \times 10^{-2bc}$ | $-4.78 \times 10^{-2} \pm 2.06 \times 10^{-2c}$  |
| Succinate            | $3.95 \times 10^{-1} \pm 1.48 \times 10^{-1b}$   | $5.65 \times 10^{-1} \pm 1.68 \times 10^{-1a}$   | $8.81 \times 10^{-2} \pm 3.38 \times 10^{-2c}$   | $7.67 \times 10^{-1} \pm 6.25 \times 10^{-2a}$   |
| Pyruvate             | $6.20 \times 10^{+0} \pm 2.88 \times 10^{+0a}$   | $7.06 \times 10^{+0} \pm 2.42 \times 10^{+0a}$   | $1.02 \times 10^{+0} \pm 6.19 \times 10^{-1b}$   | $1.22 \times 10^{+0} \pm 7.88 \times 10^{-1b}$   |
| p-cresol             | $2.70 \times 10^{-3} \pm 2.75 \times 10^{-3b}$   | $2.94 \times 10^{-3} \pm 1.86 \times 10^{-3ab}$  | $6.58 \times 10^{-3} \pm 4.47 \times 10^{-3ab}$  | $8.52 \times 10^{-3} \pm 4.12 \times 10^{-3a}$   |
| Acetone              | $-3.34 \times 10^{-3} \pm 2.43 \times 10^{-3b}$  | $-4.82 \times 10^{-4} \pm 2.67 \times 10^{-3a}$  | $-1.99 \times 10^{-3} \pm 3.01 \times 10^{-3ab}$ | $-1.46 \times 10^{-3} \pm 3.38 \times 10^{-3ab}$ |
| Methionine           | $-6.37 \times 10^{-2} \pm 3.73 \times 10^{-2a}$  | $-1.22 \times 10^{-1} \pm 3.30 \times 10^{-2b}$  | $-2.18 \times 10^{-2} \pm 1.39 \times 10^{-2a}$  | $-2.13 \times 10^{-1} \pm 2.43 \times 10^{-2c}$  |
| Acetate              | $6.62 \times 10^{-1} \pm 5.73 \times 10^{-1a}$   | $-1.55 \times 10^{-1} \pm 7.07 \times 10^{-2b}$  | $1.61 \times 10^{-1} \pm 5.34 \times 10^{-1b}$   | $1.99 \times 10^{-1} \pm 4.54 \times 10^{-1ab}$  |
| N6-Acetyllysine      | $-4.86 \times 10^{-2} \pm 1.84 \times 10^{-2b}$  | $-7.83 \times 10^{-2} \pm 5.49 \times 10^{-2c}$  | $-5.23 \times 10^{-3} \pm 5.26 \times 10^{-2b}$  | $1.01 \times 10^{-1} \pm 4.07 \times 10^{-2a}$   |
| Alanine              | $1.30 \times 10^{-2} \pm 9.93 \times 10^{-2c}$   | $1.58 \times 10^{-1} \pm 8.11 \times 10^{-2b}$   | $4.72 \times 10^{-1} \pm 2.64 \times 10^{-1a}$   | $-3.87 \times 10^{-1} \pm 2.47 \times 10^{-2d}$  |
| Alloisoleucine       | $3.91 \times 10^{-1} \pm 1.54 \times 10^{-1bc}$  | $7.10 \times 10^{-1} \pm 1.82 \times 10^{-1a}$   | $2.46 \times 10^{-1} \pm 1.47 \times 10^{-1c}$   | $5.93 \times 10^{-1} \pm 1.18 \times 10^{-1ab}$  |
| Acetoin              | $1.67 \times 10^{-1} \pm 8.59 \times 10^{-2ab}$  | $5.89 \times 10^{-2} \pm 3.27 \times 10^{-2b}$   | $3.13 \times 10^{-1} \pm 2.99 \times 10^{-1a}$   | $2.03 \times 10^{-1} \pm 4.45 \times 10^{-2ab}$  |
| Ethanol              | $8.29 \times 10^{+1} \pm 2.14 \times 10^{+1a}$   | $1.02 \times 10^{+2} \pm 2.08 \times 10^{+1a}$   | $4.23 \times 10^{+1} \pm 2.28 \times 10^{+1b}$   | $1.17 \times 10^{+2} \pm 7.55 \times 10^{+0a}$   |
| 2,3-Butanediol       | $2.01 \times 10^{-1} \pm 9.03 \times 10^{-2b}$   | $1.76 \times 10^{-1} \pm 3.92 \times 10^{-2b}$   | $4.25 \times 10^{-2} \pm 4.03 \times 10^{-2c}$   | $6.33 \times 10^{-1} \pm 8.61 \times 10^{-2a}$   |
| Isoleucine           | $-3.21 \times 10^{-2} \pm 1.51 \times 10^{-2a}$  | $-7.51 \times 10^{-2} \pm 1.46 \times 10^{-2b}$  | $-5.09 \times 10^{-2} \pm 1.89 \times 10^{-2a}$  | $-1.00 \times 10^{-1} \pm 2.38 \times 10^{-2b}$  |
| Valine               | $-2.58 \times 10^{-2} \pm 2.10 \times 10^{-2b}$  | $4.18 \times 10^{-2} \pm 4.16 \times 10^{-2a}$   | $-1.50 \times 10^{-2} \pm 1.48 \times 10^{-2b}$  | $-1.39 \times 10^{-1} \pm 2.95 \times 10^{-2c}$  |
| Leucine              | $-7.97 \times 10^{-3} \pm 1.09 \times 10^{-1a}$  | $-1.58 \times 10^{-1} \pm 1.24 \times 10^{-1b}$  | $-8.72 \times 10^{-2} \pm 8.74 \times 10^{-2ab}$ | $-1.40 \times 10^{-1} \pm 2.49 \times 10^{-2ab}$ |
| 2-Oxoisocaproate     | $2.35 \times 10^{-2} \pm 1.84 \times 10^{-2c}$   | $3.89 \times 10^{-2} \pm 3.88 \times 10^{-2bc}$  | $1.17 \times 10^{-1} \pm 4.29 \times 10^{-2a}$   | $6.85 \times 10^{-2} \pm 1.49 \times 10^{-2ab}$  |

\* Compact letters display of the comparisons between each pair of groups, where two mean values followed by a common superscript are not significantly different.

**Table S5: Concentration (mmol/L, mean  $\pm$  sd) of intracellular metabolites significantly different in relation to *Candida* species.**

|                     | <i>C. albicans</i><br>complex                     | <i>C. glabrata</i>                              | <i>C. parapsilosis</i>                          | <i>C. tropicalis</i>                            |
|---------------------|---------------------------------------------------|-------------------------------------------------|-------------------------------------------------|-------------------------------------------------|
| ADP                 | $2.48 \times 10^{-3} \pm 8.27 \times 10^{-4ab^*}$ | $1.81 \times 10^{-3} \pm 5.63 \times 10^{-4b}$  | $2.28 \times 10^{-3} \pm 1.02 \times 10^{-3ab}$ | $3.82 \times 10^{-3} \pm 6.97 \times 10^{-4a}$  |
| Tyrosine            | $9.88 \times 10^{-3} \pm 2.32 \times 10^{-3c}$    | $1.33 \times 10^{-2} \pm 1.33 \times 10^{-3b}$  | $9.94 \times 10^{-3} \pm 1.96 \times 10^{-3c}$  | $2.17 \times 10^{-2} \pm 1.28 \times 10^{-3a}$  |
| Fumarate            | $3.65 \times 10^{-3} \pm 5.74 \times 10^{-4b}$    | $3.99 \times 10^{-3} \pm 6.99 \times 10^{-4b}$  | $3.21 \times 10^{-3} \pm 8.01 \times 10^{-4b}$  | $5.17 \times 10^{-3} \pm 7.46 \times 10^{-4a}$  |
| AMP                 | $1.14 \times 10^{-2} \pm 3.27 \times 10^{-3b}$    | $2.00 \times 10^{-2} \pm 3.88 \times 10^{-3a}$  | $1.83 \times 10^{-2} \pm 4.19 \times 10^{-3a}$  | $1.67 \times 10^{-2} \pm 4.60 \times 10^{-3ab}$ |
| Adenosine           | $8.99 \times 10^{-3} \pm 2.30 \times 10^{-3b}$    | $1.24 \times 10^{-2} \pm 3.20 \times 10^{-3a}$  | $1.11 \times 10^{-2} \pm 2.97 \times 10^{-3ab}$ | $8.71 \times 10^{-3} \pm 1.30 \times 10^{-3b}$  |
| NAD                 | $6.90 \times 10^{-3} \pm 1.33 \times 10^{-3a}$    | $4.77 \times 10^{-3} \pm 1.28 \times 10^{-3b}$  | $6.07 \times 10^{-3} \pm 1.01 \times 10^{-3ab}$ | $6.38 \times 10^{-3} \pm 7.71 \times 10^{-4ab}$ |
| UMP                 | $9.40 \times 10^{-3} \pm 2.98 \times 10^{-3c}$    | $1.03 \times 10^{-2} \pm 1.30 \times 10^{-3bc}$ | $1.31 \times 10^{-2} \pm 1.92 \times 10^{-3ab}$ | $1.54 \times 10^{-2} \pm 4.79 \times 10^{-3a}$  |
| Glucose-1-phosphate | $3.90 \times 10^{-2} \pm 2.53 \times 10^{-2a}$    | $1.19 \times 10^{-2} \pm 5.37 \times 10^{-3b}$  | $2.76 \times 10^{-2} \pm 1.53 \times 10^{-2ab}$ | $1.66 \times 10^{-2} \pm 1.08 \times 10^{-2ab}$ |
| Sucrose             | $1.22 \times 10^{-2} \pm 4.97 \times 10^{-3ab}$   | $1.69 \times 10^{-2} \pm 1.29 \times 10^{-2a}$  | $6.32 \times 10^{-3} \pm 2.39 \times 10^{-3b}$  | $6.57 \times 10^{-3} \pm 6.83 \times 10^{-4ab}$ |
| Threonine           | $1.25 \times 10^{-2} \pm 4.20 \times 10^{-3c}$    | $3.31 \times 10^{-2} \pm 3.73 \times 10^{-3a}$  | $1.86 \times 10^{-2} \pm 6.21 \times 10^{-3b}$  | $1.75 \times 10^{-2} \pm 8.26 \times 10^{-3bc}$ |
| Proline             | $3.57 \times 10^{-2} \pm 8.86 \times 10^{-3b}$    | $6.46 \times 10^{-2} \pm 2.17 \times 10^{-2a}$  | $5.56 \times 10^{-2} \pm 1.09 \times 10^{-2a}$  | $2.12 \times 10^{-2} \pm 8.44 \times 10^{-3b}$  |
| Lactate             | $2.37 \times 10^{-2} \pm 7.34 \times 10^{-3a}$    | $1.25 \times 10^{-2} \pm 4.89 \times 10^{-3b}$  | $1.83 \times 10^{-2} \pm 6.55 \times 10^{-3ab}$ | $2.95 \times 10^{-2} \pm 1.45 \times 10^{-2a}$  |
| Trehalose           | $2.89 \times 10^{-2} \pm 2.91 \times 10^{-2b}$    | $8.64 \times 10^{-1} \pm 3.91 \times 10^{-1a}$  | $5.40 \times 10^{-1} \pm 3.90 \times 10^{-1a}$  | $1.53 \times 10^{-2} \pm 4.39 \times 10^{-3b}$  |
| Glycerol            | $1.14 \times 10^{+0} \pm 5.04 \times 10^{-1a}$    | $6.81 \times 10^{-1} \pm 5.63 \times 10^{-1b}$  | $6.31 \times 10^{-1} \pm 4.28 \times 10^{-1ab}$ | $3.68 \times 10^{-1} \pm 7.93 \times 10^{-2b}$  |
| Glucose             | $5.08 \times 10^{-2} \pm 7.57 \times 10^{-2b}$    | $2.05 \times 10^{-1} \pm 1.18 \times 10^{-1a}$  | $5.55 \times 10^{-1} \pm 6.75 \times 10^{-1a}$  | $1.08 \times 10^{-2} \pm 4.22 \times 10^{-3b}$  |

|                        |                                                 |                                                 |                                                 |                                                 |
|------------------------|-------------------------------------------------|-------------------------------------------------|-------------------------------------------------|-------------------------------------------------|
| O-Phosphocholine       | $3.91 \times 10^{-3} \pm 3.42 \times 10^{-3bc}$ | $7.92 \times 10^{-3} \pm 2.05 \times 10^{-3a}$  | $5.99 \times 10^{-3} \pm 1.64 \times 10^{-3ab}$ | $2.41 \times 10^{-3} \pm 1.45 \times 10^{-3c}$  |
| Ornithine              | $3.35 \times 10^{-3} \pm 2.46 \times 10^{-3b}$  | $8.24 \times 10^{-3} \pm 6.89 \times 10^{-3ab}$ | $1.23 \times 10^{-2} \pm 6.90 \times 10^{-3a}$  | $9.03 \times 10^{-3} \pm 5.34 \times 10^{-3ab}$ |
| Lysine                 | $3.50 \times 10^{-2} \pm 1.21 \times 10^{-2c}$  | $4.48 \times 10^{-2} \pm 9.29 \times 10^{-3bc}$ | $9.28 \times 10^{-2} \pm 6.41 \times 10^{-2a}$  | $8.17 \times 10^{-2} \pm 1.22 \times 10^{-2ab}$ |
| Asparagine             | $2.26 \times 10^{-2} \pm 6.19 \times 10^{-3b}$  | $3.24 \times 10^{-2} \pm 6.98 \times 10^{-3a}$  | $2.18 \times 10^{-2} \pm 6.43 \times 10^{-3b}$  | $2.49 \times 10^{-2} \pm 2.63 \times 10^{-3ab}$ |
| Aspartate              | $3.33 \times 10^{-2} \pm 1.37 \times 10^{-2c}$  | $5.78 \times 10^{-2} \pm 1.20 \times 10^{-2b}$  | $3.81 \times 10^{-2} \pm 1.23 \times 10^{-2bc}$ | $9.78 \times 10^{-2} \pm 2.00 \times 10^{-2a}$  |
| Malate                 | $4.01 \times 10^{-2} \pm 9.92 \times 10^{-3b}$  | $5.43 \times 10^{-2} \pm 1.04 \times 10^{-2a}$  | $5.74 \times 10^{-2} \pm 5.15 \times 10^{-3a}$  | $7.47 \times 10^{-2} \pm 1.10 \times 10^{-2a}$  |
| Methionine             | $9.61 \times 10^{-3} \pm 3.80 \times 10^{-3b}$  | $1.44 \times 10^{-2} \pm 4.21 \times 10^{-3a}$  | $1.40 \times 10^{-2} \pm 4.94 \times 10^{-3ab}$ | $8.15 \times 10^{-3} \pm 1.74 \times 10^{-3b}$  |
| Citrate                | $3.34 \times 10^{-2} \pm 4.83 \times 10^{-3b}$  | $3.49 \times 10^{-2} \pm 5.66 \times 10^{-3ab}$ | $4.13 \times 10^{-2} \pm 7.55 \times 10^{-3a}$  | $3.75 \times 10^{-2} \pm 1.21 \times 10^{-3ab}$ |
| Glutamine              | $3.73 \times 10^{-2} \pm 1.82 \times 10^{-2b}$  | $1.22 \times 10^{-1} \pm 4.35 \times 10^{-2a}$  | $5.86 \times 10^{-2} \pm 3.95 \times 10^{-2b}$  | $5.11 \times 10^{-2} \pm 1.12 \times 10^{-2b}$  |
| 2-Oxoglutarate         | $4.01 \times 10^{-3} \pm 8.68 \times 10^{-4b}$  | $7.64 \times 10^{-3} \pm 3.90 \times 10^{-3a}$  | $3.94 \times 10^{-3} \pm 8.90 \times 10^{-4b}$  | $3.32 \times 10^{-3} \pm 5.81 \times 10^{-4b}$  |
| Pyroglutamate          | $8.13 \times 10^{-3} \pm 1.40 \times 10^{-3a}$  | $7.72 \times 10^{-3} \pm 2.31 \times 10^{-3a}$  | $7.24 \times 10^{-3} \pm 3.80 \times 10^{-3ab}$ | $4.78 \times 10^{-3} \pm 1.76 \times 10^{-3b}$  |
| Succinate              | $1.86 \times 10^{-2} \pm 5.03 \times 10^{-3a}$  | $1.33 \times 10^{-2} \pm 2.12 \times 10^{-3b}$  | $8.99 \times 10^{-3} \pm 2.59 \times 10^{-3c}$  | $1.72 \times 10^{-2} \pm 5.41 \times 10^{-3ab}$ |
| Pyruvate               | $2.52 \times 10^{-2} \pm 1.05 \times 10^{-2a}$  | $3.06 \times 10^{-2} \pm 1.16 \times 10^{-2a}$  | $7.97 \times 10^{-3} \pm 2.20 \times 10^{-3b}$  | $6.92 \times 10^{-3} \pm 4.06 \times 10^{-3b}$  |
| Glutamate              | $6.61 \times 10^{-2} \pm 3.53 \times 10^{-2b}$  | $2.60 \times 10^{-1} \pm 5.45 \times 10^{-2a}$  | $1.76 \times 10^{-1} \pm 5.36 \times 10^{-2a}$  | $1.90 \times 10^{-1} \pm 5.29 \times 10^{-2a}$  |
| Acetone                | $1.67 \times 10^{-2} \pm 8.48 \times 10^{-3a}$  | $5.07 \times 10^{-3} \pm 4.43 \times 10^{-3b}$  | $5.19 \times 10^{-3} \pm 4.08 \times 10^{-3b}$  | $1.74 \times 10^{-2} \pm 1.06 \times 10^{-2a}$  |
| Acetate                | $1.04 \times 10^{+0} \pm 4.77 \times 10^{-1a}$  | $4.03 \times 10^{-1} \pm 1.78 \times 10^{-1b}$  | $2.53 \times 10^{-1} \pm 1.30 \times 10^{-1b}$  | $2.72 \times 10^{-1} \pm 1.42 \times 10^{-1b}$  |
| 3-Methyl-2-oxovalerate | $5.47 \times 10^{-2} \pm 1.24 \times 10^{-2b}$  | $7.57 \times 10^{-2} \pm 7.22 \times 10^{-3a}$  | $7.82 \times 10^{-2} \pm 1.92 \times 10^{-2a}$  | $7.11 \times 10^{-2} \pm 1.05 \times 10^{-2ab}$ |
| Alanine                | $1.30 \times 10^{-1} \pm 5.37 \times 10^{-2b}$  | $1.78 \times 10^{-1} \pm 5.95 \times 10^{-2ab}$ | $2.67 \times 10^{-1} \pm 1.06 \times 10^{-1a}$  | $1.34 \times 10^{-1} \pm 1.68 \times 10^{-2ab}$ |
| Acetoin                | $1.20 \times 10^{-2} \pm 3.52 \times 10^{-3a}$  | $4.39 \times 10^{-3} \pm 1.50 \times 10^{-3b}$  | $8.74 \times 10^{-3} \pm 4.87 \times 10^{-3a}$  | $9.61 \times 10^{-3} \pm 1.81 \times 10^{-3a}$  |
| Ethanol                | $3.29 \times 10^{+0} \pm 1.16 \times 10^{+0a}$  | $1.80 \times 10^{+0} \pm 6.43 \times 10^{-1b}$  | $1.53 \times 10^{+0} \pm 4.66 \times 10^{-1b}$  | $3.06 \times 10^{+0} \pm 1.75 \times 10^{+0ab}$ |
| 2,3-Butanediol         | $9.67 \times 10^{-3} \pm 2.42 \times 10^{-3a}$  | $3.52 \times 10^{-3} \pm 1.13 \times 10^{-3b}$  | $4.83 \times 10^{-3} \pm 2.73 \times 10^{-3b}$  | $1.13 \times 10^{-2} \pm 4.00 \times 10^{-3a}$  |
| Propionate             | $1.33 \times 10^{-1} \pm 2.72 \times 10^{-2a}$  | $6.50 \times 10^{-2} \pm 3.23 \times 10^{-2b}$  | $6.40 \times 10^{-2} \pm 2.91 \times 10^{-2b}$  | $7.52 \times 10^{-2} \pm 5.28 \times 10^{-3b}$  |
| Isoleucine             | $1.18 \times 10^{-2} \pm 2.52 \times 10^{-3b}$  | $1.59 \times 10^{-2} \pm 2.28 \times 10^{-3a}$  | $1.44 \times 10^{-2} \pm 5.11 \times 10^{-3ab}$ | $1.76 \times 10^{-2} \pm 3.20 \times 10^{-3a}$  |
| Valine                 | $2.17 \times 10^{-2} \pm 4.01 \times 10^{-3b}$  | $3.87 \times 10^{-2} \pm 7.38 \times 10^{-3a}$  | $3.47 \times 10^{-2} \pm 6.72 \times 10^{-3a}$  | $3.82 \times 10^{-2} \pm 7.81 \times 10^{-3a}$  |
| 2-Aminobutyrate        | $4.77 \times 10^{-3} \pm 1.02 \times 10^{-3b}$  | $4.21 \times 10^{-3} \pm 6.90 \times 10^{-4b}$  | $7.23 \times 10^{-3} \pm 2.05 \times 10^{-3a}$  | $4.70 \times 10^{-3} \pm 6.60 \times 10^{-4b}$  |
| Leucine                | $6.52 \times 10^{-2} \pm 1.78 \times 10^{-2b}$  | $9.43 \times 10^{-2} \pm 1.52 \times 10^{-2a}$  | $8.98 \times 10^{-2} \pm 3.67 \times 10^{-2ab}$ | $7.40 \times 10^{-2} \pm 1.40 \times 10^{-2ab}$ |

\* Compact letters display of the comparisons between each pair of groups, where two mean values followed by a common superscript are not significantly different.

**Table S6: Concentration (mmol/L, mean  $\pm$  sd) of extracellular metabolites significantly different between *C. albicans* sub-groups expressed as difference from growth medium.**

|                | subgroup-1                                     | subgroup-2                                     | p-value               |
|----------------|------------------------------------------------|------------------------------------------------|-----------------------|
| Tryptophan     | $-2.91 \times 10^{-3} \pm 1.05 \times 10^{-2}$ | $-3.86 \times 10^{-2} \pm 3.84 \times 10^{-2}$ | $1.14 \times 10^{-3}$ |
| Cytidine       | $-2.40 \times 10^{-3} \pm 1.09 \times 10^{-3}$ | $-7.92 \times 10^{-4} \pm 1.55 \times 10^{-3}$ | $4.96 \times 10^{-2}$ |
| Guanosine      | $-2.30 \times 10^{-3} \pm 9.15 \times 10^{-5}$ | $-1.57 \times 10^{-3} \pm 1.22 \times 10^{-3}$ | $6.92 \times 10^{-3}$ |
| Hydroxyacetone | $2.53 \times 10^{-3} \pm 6.79 \times 10^{-4}$  | $4.54 \times 10^{-3} \pm 2.23 \times 10^{-3}$  | $2.36 \times 10^{-3}$ |
| Arabinitol     | $1.02 \pm 0.68$                                | $2.02 \pm 0.11$                                | $5.00 \times 10^{-2}$ |
| Sarcosine      | $4.67 \times 10^{-3} \pm 1.40 \times 10^{-3}$  | $5.65 \times 10^{-4} \pm 3.71 \times 10^{-3}$  | $1.81 \times 10^{-3}$ |
| Malate         | $-3.64 \times 10^{-2} \pm 7.50 \times 10^{-3}$ | $-1.32 \times 10^{-2} \pm 2.63 \times 10^{-2}$ | $2.10 \times 10^{-3}$ |
| 2-Oxoglutarate | $5.58 \times 10^{-2} \pm 3.15 \times 10^{-2}$  | $1.17 \times 10^{-1} \pm 7.27 \times 10^{-2}$  | $1.81 \times 10^{-2}$ |
| Acetone        | $-4.58 \times 10^{-3} \pm 9.10 \times 10^{-4}$ | $-3.04 \times 10^{-3} \pm 2.55 \times 10^{-3}$ | $4.26 \times 10^{-2}$ |
| Methionine     | $-3.78 \times 10^{-2} \pm 6.24 \times 10^{-3}$ | $-6.76 \times 10^{-2} \pm 3.94 \times 10^{-2}$ | $1.58 \times 10^{-3}$ |
| Acetate        | $1.72 \times 10^{-1} \pm 3.14 \times 10^{-1}$  | $7.67 \times 10^{-1} \pm 5.60 \times 10^{-1}$  | $1.91 \times 10^{-2}$ |
| Alanine        | $9.55 \times 10^{-2} \pm 2.50 \times 10^{-2}$  | $-2.68 \times 10^{-4} \pm 1.03 \times 10^{-1}$ | $6.45 \times 10^{-4}$ |
| Acetoin        | $9.37 \times 10^{-2} \pm 3.54 \times 10^{-2}$  | $1.80 \times 10^{-1} \pm 8.73 \times 10^{-2}$  | $5.61 \times 10^{-3}$ |
| Leucine        | $9.33 \times 10^{-2} \pm 3.18 \times 10^{-2}$  | $-2.83 \times 10^{-2} \pm 1.08 \times 10^{-1}$ | $2.92 \times 10^{-4}$ |

**Table S7: Concentration (mmol/L, mean  $\pm$  sd) of intracellular metabolites significantly different between *C. albicans* sub-groups**

|                  | subgroup-1                                    | subgroup-2                                    | p-value               |
|------------------|-----------------------------------------------|-----------------------------------------------|-----------------------|
| Fumarate         | $3.12 \times 10^{-3} \pm 1.64 \times 10^{-4}$ | $3.67 \times 10^{-3} \pm 4.79 \times 10^{-4}$ | $7.49 \times 10^{-4}$ |
| Trehalose        | $1.37 \times 10^{-2} \pm 2.47 \times 10^{-3}$ | $2.96 \times 10^{-2} \pm 3.00 \times 10^{-2}$ | $1.55 \times 10^{-2}$ |
| Glycerol         | $1.66 \pm 0.18$                               | $1.06 \pm 0.50$                               | $8.21 \times 10^{-4}$ |
| Glucose          | $6.30 \times 10^{-3} \pm 5.88 \times 10^{-3}$ | $5.97 \times 10^{-2} \pm 8.02 \times 10^{-2}$ | $3.06 \times 10^{-3}$ |
| O-Phosphocholine | $1.98 \times 10^{-3} \pm 3.64 \times 10^{-4}$ | $4.12 \times 10^{-3} \pm 3.63 \times 10^{-3}$ | $8.29 \times 10^{-3}$ |
| Glutamine        | $2.05 \times 10^{-2} \pm 1.59 \times 10^{-3}$ | $3.94 \times 10^{-2} \pm 1.84 \times 10^{-2}$ | $3.39 \times 10^{-5}$ |
| Pyroglutamate    | $6.82 \times 10^{-3} \pm 8.06 \times 10^{-4}$ | $8.39 \times 10^{-3} \pm 1.37 \times 10^{-3}$ | $1.68 \times 10^{-2}$ |
| 4-Aminobutyrate  | $5.15 \times 10^{-3} \pm 1.53 \times 10^{-4}$ | $6.66 \times 10^{-3} \pm 1.83 \times 10^{-3}$ | $4.35 \times 10^{-4}$ |
| Ethanol          | $4.59 \pm 0.28$                               | $3.05 \pm 1.12$                               | $1.06 \times 10^{-5}$ |
| 2-Aminobutyrate  | $4.06 \times 10^{-3} \pm 4.48 \times 10^{-4}$ | $4.89 \times 10^{-3} \pm 1.06 \times 10^{-3}$ | $2.35 \times 10^{-2}$ |

**Table S8. Mean concentration in mmol/L (sd) of extracellular metabolites significantly different between *Candida* biofilm categories.**

|                  | 0                                                | 1                                                | 2                                                | 3                                                | p-value               |
|------------------|--------------------------------------------------|--------------------------------------------------|--------------------------------------------------|--------------------------------------------------|-----------------------|
| 2-Oxoisocaproate | $2.03 \times 10^{-2}$ ( $1.83 \times 10^{-2}$ )  | $3.53 \times 10^{-2}$ ( $2.27 \times 10^{-2}$ )  | $2.43 \times 10^{-2}$ ( $6.60 \times 10^{-2}$ )  | $6.82 \times 10^{-2}$ ( $1.29 \times 10^{-2}$ )  | $1.08 \times 10^{-4}$ |
| Orotate          | $1.59 \times 10^{-3}$ ( $8.43 \times 10^{-4}$ )  | $1.59 \times 10^{-3}$ ( $5.25 \times 10^{-4}$ )  | $1.18 \times 10^{-3}$ ( $9.32 \times 10^{-4}$ )  | $5.43 \times 10^{-4}$ ( $1.88 \times 10^{-4}$ )  | $1.86 \times 10^{-3}$ |
| Inosine          | $2.14 \times 10^{-3}$ ( $5.44 \times 10^{-3}$ )  | $1.13 \times 10^{-3}$ ( $2.43 \times 10^{-3}$ )  | $-3.53 \times 10^{-4}$ ( $1.29 \times 10^{-3}$ ) | $-1.15 \times 10^{-3}$ ( $6.98 \times 10^{-4}$ ) | $7.99 \times 10^{-3}$ |
| Choline          | $-2.00 \times 10^{-2}$ ( $1.15 \times 10^{-2}$ ) | $-2.02 \times 10^{-2}$ ( $1.71 \times 10^{-2}$ ) | $-2.50 \times 10^{-2}$ ( $1.32 \times 10^{-2}$ ) | $-2.58 \times 10^{-2}$ ( $1.35 \times 10^{-3}$ ) | $1.20 \times 10^{-2}$ |
| Lysine           | $1.22 \times 10^{-1}$ ( $5.35 \times 10^{-2}$ )  | $1.23 \times 10^{-1}$ ( $5.67 \times 10^{-2}$ )  | $7.11 \times 10^{-2}$ ( $6.31 \times 10^{-2}$ )  | $8.07 \times 10^{-2}$ ( $4.74 \times 10^{-2}$ )  | $4.56 \times 10^{-2}$ |

0: no biofilm; 1: weak producers; 2 intermediate producers; 3 strong producers

**Table S9. Mean concentration in mmol/L (sd) of intracellular metabolites significantly different between *Candida* biofilm categories.**

|                | 0                                               | 1                                               | 2                                               | 3                                               | p-value               |
|----------------|-------------------------------------------------|-------------------------------------------------|-------------------------------------------------|-------------------------------------------------|-----------------------|
| Ornithine      | $2.97 \times 10^{-3}$ ( $2.35 \times 10^{-3}$ ) | $4.00 \times 10^{-3}$ ( $4.84 \times 10^{-3}$ ) | $4.37 \times 10^{-3}$ ( $1.83 \times 10^{-3}$ ) | $1.00 \times 10^{-2}$ ( $1.82 \times 10^{-3}$ ) | $2.49 \times 10^{-4}$ |
| Malate         | $3.68 \times 10^{-2}$ ( $2.15 \times 10^{-2}$ ) | $4.89 \times 10^{-2}$ ( $2.05 \times 10^{-2}$ ) | $4.59 \times 10^{-2}$ ( $2.18 \times 10^{-2}$ ) | $6.06 \times 10^{-2}$ ( $1.27 \times 10^{-2}$ ) | $4.80 \times 10^{-4}$ |
| 2-Oxoglutarate | $4.62 \times 10^{-3}$ ( $1.21 \times 10^{-3}$ ) | $4.25 \times 10^{-3}$ ( $9.50 \times 10^{-4}$ ) | $4.25 \times 10^{-3}$ ( $1.39 \times 10^{-3}$ ) | $3.45 \times 10^{-3}$ ( $3.28 \times 10^{-4}$ ) | $2.61 \times 10^{-3}$ |
| Pyruvate       | $3.11 \times 10^{-2}$ ( $1.20 \times 10^{-2}$ ) | $2.41 \times 10^{-2}$ ( $1.23 \times 10^{-2}$ ) | $1.65 \times 10^{-2}$ ( $1.43 \times 10^{-2}$ ) | $9.46 \times 10^{-3}$ ( $5.61 \times 10^{-3}$ ) | $7.30 \times 10^{-3}$ |
| UMP            | $8.04 \times 10^{-3}$ ( $2.50 \times 10^{-3}$ ) | $1.07 \times 10^{-2}$ ( $3.03 \times 10^{-3}$ ) | $1.13 \times 10^{-2}$ ( $1.30 \times 10^{-3}$ ) | $1.52 \times 10^{-2}$ ( $2.05 \times 10^{-3}$ ) | $1.67 \times 10^{-2}$ |
| Glutamate      | $4.72 \times 10^{-2}$ ( $1.88 \times 10^{-1}$ ) | $9.63 \times 10^{-2}$ ( $1.49 \times 10^{-1}$ ) | $9.72 \times 10^{-2}$ ( $1.06 \times 10^{-1}$ ) | $1.50 \times 10^{-1}$ ( $3.15 \times 10^{-2}$ ) | $3.07 \times 10^{-2}$ |
| AMP            | $1.16 \times 10^{-2}$ ( $6.68 \times 10^{-3}$ ) | $1.41 \times 10^{-2}$ ( $9.47 \times 10^{-3}$ ) | $1.41 \times 10^{-2}$ ( $3.90 \times 10^{-3}$ ) | $1.93 \times 10^{-2}$ ( $5.38 \times 10^{-3}$ ) | $4.20 \times 10^{-2}$ |
| Lysine         | $2.97 \times 10^{-2}$ ( $2.33 \times 10^{-2}$ ) | $4.12 \times 10^{-2}$ ( $1.94 \times 10^{-2}$ ) | $4.56 \times 10^{-2}$ ( $2.14 \times 10^{-2}$ ) | $5.96 \times 10^{-2}$ ( $2.65 \times 10^{-2}$ ) | $4.56 \times 10^{-2}$ |
| Glycerol       | $1.28$ ( $1.19$ )                               | $1.23$ ( $8.47 \times 10^{-1}$ )                | $7.48 \times 10^{-1}$ ( $6.05 \times 10^{-1}$ ) | $4.24 \times 10^{-1}$ ( $1.69 \times 10^{-1}$ ) | $4.88 \times 10^{-2}$ |

0: no biofilm; 1: weak producers; 2 intermediate producers; 3 strong producers

**Table S10. Mean concentration in mmol/L (sd) of extracellular metabolites significantly different between fluconazole-resistant (R) and susceptible (S) *Candida* strains.**

|                        | R                                                 | S                                                 | p-value                |
|------------------------|---------------------------------------------------|---------------------------------------------------|------------------------|
| Isoleucine             | -7.33x10 <sup>-02</sup> (2.29x10 <sup>-02</sup> ) | -3.67x10 <sup>-02</sup> (1.67x10 <sup>-02</sup> ) | 5.18x10 <sup>-06</sup> |
| Sarcosine              | -7.54x10 <sup>-03</sup> (8.74x10 <sup>-03</sup> ) | 1.67x10 <sup>-03</sup> (4.31x10 <sup>-03</sup> )  | 2.60x10 <sup>-05</sup> |
| Inosine                | 3.31x10 <sup>-03</sup> (5.23x10 <sup>-03</sup> )  | 1.54x10 <sup>-05</sup> (1.96x10 <sup>-03</sup> )  | 2.58x10 <sup>-04</sup> |
| Asparagine             | -1.47x10 <sup>-01</sup> (6.30x10 <sup>-02</sup> ) | -1.73x10 <sup>-01</sup> (1.35x10 <sup>-02</sup> ) | 1.76x10 <sup>-03</sup> |
| Acetate                | -1.27x10 <sup>-01</sup> (4.68x10 <sup>-01</sup> ) | 5.09x10 <sup>-01</sup> (9.90x10 <sup>-01</sup> )  | 2.22x10 <sup>-03</sup> |
| Fumarate               | 1.29x10 <sup>-02</sup> (8.68x10 <sup>-03</sup> )  | 2.64x10 <sup>-02</sup> (2.12x10 <sup>-02</sup> )  | 2.79x10 <sup>-03</sup> |
| Arabinitol             | -6.87x10 <sup>-03</sup> (1.95)                    | 1.63 (1.35)                                       | 2.93x10 <sup>-03</sup> |
| Leucine                | -1.35x10 <sup>-01</sup> (1.26x10 <sup>-01</sup> ) | 8.69x10 <sup>-03</sup> (1.66x10 <sup>-01</sup> )  | 3.01x10 <sup>-03</sup> |
| Alloisoleucine         | 6.31x10 <sup>-01</sup> (2.77x10 <sup>-01</sup> )  | 3.73x10 <sup>-01</sup> (1.80x10 <sup>-01</sup> )  | 3.91x10 <sup>-03</sup> |
| Choline                | -8.94x10 <sup>-03</sup> (5.37x10 <sup>-02</sup> ) | -2.37x10 <sup>-02</sup> (9.53x10 <sup>-03</sup> ) | 3.96x10 <sup>-03</sup> |
| Guanosine              | 1.90x10 <sup>-03</sup> (5.19x10 <sup>-03</sup> )  | -2.05x10 <sup>-03</sup> (2.53x10 <sup>-03</sup> ) | 5.30x10 <sup>-03</sup> |
| Methionine             | -1.19x10 <sup>-01</sup> (5.57x10 <sup>-02</sup> ) | -5.65x10 <sup>-02</sup> (5.82x10 <sup>-02</sup> ) | 5.75x10 <sup>-03</sup> |
| Phenylalanine          | 1.27x10 <sup>-02</sup> (4.30x10 <sup>-02</sup> )  | 6.18x10 <sup>-02</sup> (4.42x10 <sup>-02</sup> )  | 7.53x10 <sup>-03</sup> |
| Cytidine               | 2.21x10 <sup>-03</sup> (6.43x10 <sup>-03</sup> )  | -8.24x10 <sup>-04</sup> (2.92x10 <sup>-03</sup> ) | 8.18x10 <sup>-03</sup> |
| Succinate              | 5.29x10 <sup>-01</sup> (2.10x10 <sup>-01</sup> )  | 3.40x10 <sup>-01</sup> (2.65x10 <sup>-01</sup> )  | 1.01x10 <sup>-02</sup> |
| Acetoin                | 7.77x10 <sup>-02</sup> (1.10x10 <sup>-01</sup> )  | 1.86x10 <sup>-01</sup> (1.44x10 <sup>-01</sup> )  | 1.02x10 <sup>-02</sup> |
| Formate                | -1.81x10 <sup>-02</sup> (2.68x10 <sup>-02</sup> ) | 1.22x10 <sup>-02</sup> (4.77x10 <sup>-02</sup> )  | 1.06x10 <sup>-02</sup> |
| Malate                 | 1.14x10 <sup>-02</sup> (6.26x10 <sup>-02</sup> )  | -2.76x10 <sup>-02</sup> (3.22x10 <sup>-02</sup> ) | 1.70x10 <sup>-02</sup> |
| 3-Methyl-2-oxovalerate | 4.70x10 <sup>-02</sup> (1.60x10 <sup>-02</sup> )  | 3.15x10 <sup>-02</sup> (1.37x10 <sup>-02</sup> )  | 2.76x10 <sup>-02</sup> |
| N6-Acetyllysine        | -8.36x10 <sup>-02</sup> (4.77x10 <sup>-02</sup> ) | -4.29x10 <sup>-02</sup> (3.43x10 <sup>-02</sup> ) | 2.99x10 <sup>-02</sup> |
| Glucose                | -3.89x10 <sup>+01</sup> (1.10x10 <sup>+01</sup> ) | -3.15x10 <sup>+01</sup> (1.01x10 <sup>+01</sup> ) | 3.86x10 <sup>-02</sup> |
| Ethanol                | 1.02x10 <sup>+02</sup> (1.88x10 <sup>+01</sup> )  | 8.32x10 <sup>+01</sup> (2.94x10 <sup>+01</sup> )  | 4.87x10 <sup>-02</sup> |

**Table S11. Mean concentration in mmol/L (sd) of intracellular metabolites significantly different between fluconazole-resistant (R) and susceptible (S) *Candida* strains.**

|                        | R                                                | S                                                | p-value                |
|------------------------|--------------------------------------------------|--------------------------------------------------|------------------------|
| Glutamate              | 2.18x10 <sup>-01</sup> (1.22x10 <sup>-01</sup> ) | 6.38x10 <sup>-02</sup> (6.77x10 <sup>-02</sup> ) | 1.05x10 <sup>-05</sup> |
| Glutamine              | 9.97x10 <sup>-02</sup> (7.09x10 <sup>-02</sup> ) | 3.27x10 <sup>-02</sup> (1.94x10 <sup>-02</sup> ) | 1.92x10 <sup>-05</sup> |
| Threonine              | 2.77x10 <sup>-02</sup> (1.65x10 <sup>-02</sup> ) | 1.33x10 <sup>-02</sup> (4.19x10 <sup>-03</sup> ) | 5.60x10 <sup>-05</sup> |
| Acetone                | 4.00x10 <sup>-03</sup> (4.28x10 <sup>-03</sup> ) | 1.52x10 <sup>-02</sup> (1.28x10 <sup>-02</sup> ) | 1.71x10 <sup>-04</sup> |
| Acetoin                | 5.92x10 <sup>-03</sup> (3.41x10 <sup>-03</sup> ) | 1.17x10 <sup>-02</sup> (5.37x10 <sup>-03</sup> ) | 2.49x10 <sup>-04</sup> |
| AMP                    | 1.92x10 <sup>-02</sup> (6.30x10 <sup>-03</sup> ) | 1.24x10 <sup>-02</sup> (5.93x10 <sup>-03</sup> ) | 2.97x10 <sup>-04</sup> |
| Asparagine             | 3.13x10 <sup>-02</sup> (1.25x10 <sup>-02</sup> ) | 2.17x10 <sup>-02</sup> (6.55x10 <sup>-03</sup> ) | 4.84x10 <sup>-04</sup> |
| Aspartate              | 5.81x10 <sup>-02</sup> (1.37x10 <sup>-02</sup> ) | 2.95x10 <sup>-02</sup> (1.80x10 <sup>-02</sup> ) | 9.38x10 <sup>-04</sup> |
| Adenosine              | 1.21x10 <sup>-02</sup> (4.58x10 <sup>-03</sup> ) | 8.29x10 <sup>-03</sup> (3.13x10 <sup>-03</sup> ) | 1.60x10 <sup>-03</sup> |
| Tyrosine               | 1.27x10 <sup>-02</sup> (2.60x10 <sup>-03</sup> ) | 9.83x10 <sup>-03</sup> (3.96x10 <sup>-03</sup> ) | 1.69x10 <sup>-03</sup> |
| Propionate             | 6.93x10 <sup>-02</sup> (7.67x10 <sup>-02</sup> ) | 1.26x10 <sup>-01</sup> (5.11x10 <sup>-02</sup> ) | 1.76x10 <sup>-03</sup> |
| Trehalose              | 6.95x10 <sup>-01</sup> (8.09x10 <sup>-01</sup> ) | 2.03x10 <sup>-02</sup> (5.63x10 <sup>-02</sup> ) | 2.19x10 <sup>-03</sup> |
| 2,3-Butanediol         | 4.57x10 <sup>-03</sup> (4.02x10 <sup>-03</sup> ) | 9.53x10 <sup>-03</sup> (2.57x10 <sup>-03</sup> ) | 2.60x10 <sup>-03</sup> |
| 2-Oxoglutarate         | 4.96x10 <sup>-03</sup> (2.18x10 <sup>-03</sup> ) | 3.95x10 <sup>-03</sup> (1.16x10 <sup>-03</sup> ) | 2.95x10 <sup>-03</sup> |
| O-Phosphocholine       | 6.90x10 <sup>-03</sup> (4.13x10 <sup>-03</sup> ) | 2.61x10 <sup>-03</sup> (3.02x10 <sup>-03</sup> ) | 4.51x10 <sup>-03</sup> |
| Glycerol               | 4.07x10 <sup>-01</sup> (4.28x10 <sup>-01</sup> ) | 1.23x10 <sup>+00</sup> (8.20x10 <sup>-01</sup> ) | 4.82x10 <sup>-03</sup> |
| Valine                 | 3.42x10 <sup>-02</sup> (1.72x10 <sup>-02</sup> ) | 2.32x10 <sup>-02</sup> (6.95x10 <sup>-03</sup> ) | 5.36x10 <sup>-03</sup> |
| Ethanol                | 2.07 (1.08)                                      | 3.17 (1.90)                                      | 8.11x10 <sup>-03</sup> |
| Ornithine              | 4.96x10 <sup>-03</sup> (1.14x10 <sup>-02</sup> ) | 3.68x10 <sup>-03</sup> (2.89x10 <sup>-03</sup> ) | 3.29x10 <sup>-02</sup> |
| Malate                 | 5.37x10 <sup>-02</sup> (1.23x10 <sup>-02</sup> ) | 4.25x10 <sup>-02</sup> (1.84x10 <sup>-02</sup> ) | 3.38x10 <sup>-02</sup> |
| Proline                | 4.56x10 <sup>-02</sup> (3.24x10 <sup>-02</sup> ) | 3.75x10 <sup>-02</sup> (6.10x10 <sup>-03</sup> ) | 3.39x10 <sup>-02</sup> |
| Glucose-1-phosphate    | 1.48x10 <sup>-02</sup> (1.93x10 <sup>-02</sup> ) | 2.84x10 <sup>-02</sup> (3.48x10 <sup>-02</sup> ) | 4.21x10 <sup>-02</sup> |
| Isoleucine             | 1.49x10 <sup>-02</sup> (5.90x10 <sup>-03</sup> ) | 1.22x10 <sup>-02</sup> (3.80x10 <sup>-03</sup> ) | 4.83x10 <sup>-02</sup> |
| 3-Methyl-2-oxovalerate | 7.20x10 <sup>-02</sup> (1.46x10 <sup>-02</sup> ) | 6.19x10 <sup>-02</sup> (2.34x10 <sup>-02</sup> ) | 4.92x10 <sup>-02</sup> |

**Table S12. Mean concentration in mmol/L (sd) of extracellular metabolites significantly different between caspofungin-resistant (R) and susceptible (S) *Candida* strains.**

|                  | R                                                 | S                                                 | p-value                |
|------------------|---------------------------------------------------|---------------------------------------------------|------------------------|
| Putrescine       | 5.35x10 <sup>-03</sup> (4.37x10 <sup>-03</sup> )  | -3.16x10 <sup>-03</sup> (9.73x10 <sup>-03</sup> ) | 3.06x10 <sup>-05</sup> |
| Pyruvate         | 1.28 (1.04)                                       | 6.02 (4.36)                                       | 1.25x10 <sup>-04</sup> |
| Glucose          | -24.4 (10.5)                                      | -35.6 (15.9)                                      | 1.48x10 <sup>-04</sup> |
| Ribose           | -4.47x10 <sup>-02</sup> (2.25x10 <sup>-02</sup> ) | -7.22x10 <sup>-02</sup> (3.60x10 <sup>-02</sup> ) | 3.24x10 <sup>-04</sup> |
| Methionine       | -2.65x10 <sup>-02</sup> (2.52x10 <sup>-02</sup> ) | -8.71x10 <sup>-02</sup> (7.88x10 <sup>-02</sup> ) | 3.32x10 <sup>-04</sup> |
| Choline          | -3.00x10 <sup>-02</sup> (1.50x10 <sup>-03</sup> ) | -1.94x10 <sup>-02</sup> (1.16x10 <sup>-02</sup> ) | 3.68x10 <sup>-04</sup> |
| Mannose          | 6.57x10 <sup>-02</sup> (3.66x10 <sup>-02</sup> )  | 1.33x10 <sup>-02</sup> (2.28x10 <sup>-02</sup> )  | 3.89x10 <sup>-03</sup> |
| 2-Oxoisocaproate | 1.13x10 <sup>-01</sup> (5.56x10 <sup>-02</sup> )  | 2.47x10 <sup>-02</sup> (3.09x10 <sup>-02</sup> )  | 5.69x10 <sup>-03</sup> |
| Arabinitol       | 3.00 (1.80)                                       | 1.25 (1.83)                                       | 7.57x10 <sup>-03</sup> |
| Methanol         | -9.72x10 <sup>-03</sup> (1.87x10 <sup>-03</sup> ) | -4.22x10 <sup>-03</sup> (4.64x10 <sup>-03</sup> ) | 8.05x10 <sup>-03</sup> |
| 2,3-Butanediol   | 5.97x10 <sup>-02</sup> (6.61x10 <sup>-02</sup> )  | 2.27x10 <sup>-01</sup> (1.14x10 <sup>-01</sup> )  | 9.36x10 <sup>-03</sup> |
| Alanine          | 5.01x10 <sup>-01</sup> (3.34x10 <sup>-01</sup> )  | 6.74x10 <sup>-02</sup> (1.42x10 <sup>-01</sup> )  | 1.06x10 <sup>-02</sup> |
| p-cresol         | 6.61x10 <sup>-03</sup> (2.47x10 <sup>-03</sup> )  | 3.27x10 <sup>-03</sup> (3.58x10 <sup>-03</sup> )  | 1.07x10 <sup>-02</sup> |
| Succinate        | 9.85x10 <sup>-02</sup> (3.94x10 <sup>-02</sup> )  | 4.54x10 <sup>-01</sup> (2.34x10 <sup>-01</sup> )  | 1.40x10 <sup>-02</sup> |
| Ethanol          | 53.3 (31.8)                                       | 9.24x10 <sup>+01</sup> (26.7)                     | 2.18x10 <sup>-02</sup> |
| Sarcosine        | 7.20x10 <sup>-04</sup> (2.37x10 <sup>-03</sup> )  | -9.87x10 <sup>-04</sup> (8.82x10 <sup>-03</sup> ) | 2.65x10 <sup>-02</sup> |
| Hydroxyacetone   | 1.14x10 <sup>-03</sup> (1.13x10 <sup>-03</sup> )  | 4.46x10 <sup>-03</sup> (3.91x10 <sup>-03</sup> )  | 3.66x10 <sup>-02</sup> |
| Phenylalanine    | -3.35x10 <sup>-02</sup> (5.90x10 <sup>-02</sup> ) | 5.37x10 <sup>-02</sup> (4.73x10 <sup>-02</sup> )  | 4.21x10 <sup>-02</sup> |
| Glycerol         | 1.58 (4.90x10 <sup>-01</sup> )                    | 2.43x10 <sup>+00</sup> (1.19)                     | 4.46x10 <sup>-02</sup> |

**Table S13. Mean concentration in mmol/L (sd) of intracellular metabolites significantly different between caspofungin-resistant (R) and susceptible (S) *Candida* strains.**

|                        | R                                                | S                                                | p-value                |
|------------------------|--------------------------------------------------|--------------------------------------------------|------------------------|
| Pyruvate               | 9.53x10 <sup>-03</sup> (2.65x10 <sup>-03</sup> ) | 2.44x10 <sup>-02</sup> (1.62x10 <sup>-02</sup> ) | 8.68x10 <sup>-06</sup> |
| Glutamate              | 1.74x10 <sup>-01</sup> (5.95x10 <sup>-02</sup> ) | 7.36x10 <sup>-02</sup> (1.36x10 <sup>-01</sup> ) | 3.58x10 <sup>-05</sup> |
| Malate                 | 5.71x10 <sup>-02</sup> (6.18x10 <sup>-03</sup> ) | 4.53x10 <sup>-02</sup> (1.85x10 <sup>-02</sup> ) | 1.25x10 <sup>-04</sup> |
| Acetate                | 2.88x10 <sup>-01</sup> (1.79x10 <sup>-01</sup> ) | 8.32x10 <sup>-01</sup> (7.85x10 <sup>-01</sup> ) | 5.75x10 <sup>-04</sup> |
| UMP                    | 1.46x10 <sup>-02</sup> (2.35x10 <sup>-03</sup> ) | 1.05x10 <sup>-02</sup> (3.87x10 <sup>-03</sup> ) | 6.29x10 <sup>-04</sup> |
| Ornithine              | 1.09x10 <sup>-02</sup> (5.37x10 <sup>-03</sup> ) | 3.48x10 <sup>-03</sup> (2.57x10 <sup>-03</sup> ) | 1.08x10 <sup>-03</sup> |
| Alanine                | 2.33x10 <sup>-01</sup> (6.20x10 <sup>-02</sup> ) | 1.28x10 <sup>-01</sup> (7.09x10 <sup>-02</sup> ) | 2.83x10 <sup>-03</sup> |
| Sucrose                | 6.44x10 <sup>-03</sup> (3.21x10 <sup>-03</sup> ) | 1.18x10 <sup>-02</sup> (7.59x10 <sup>-03</sup> ) | 3.18x10 <sup>-03</sup> |
| AMP                    | 1.90x10 <sup>-02</sup> (4.65x10 <sup>-03</sup> ) | 1.32x10 <sup>-02</sup> (7.15x10 <sup>-03</sup> ) | 4.32x10 <sup>-03</sup> |
| Trehalose              | 3.59x10 <sup>-01</sup> (4.60x10 <sup>-01</sup> ) | 2.07x10 <sup>-02</sup> (9.43x10 <sup>-02</sup> ) | 9.77x10 <sup>-03</sup> |
| O-Phosphocholine       | 5.96x10 <sup>-03</sup> (2.30x10 <sup>-03</sup> ) | 3.05x10 <sup>-03</sup> (4.74x10 <sup>-03</sup> ) | 1.12x10 <sup>-02</sup> |
| 3-Methyl-2-oxovalerate | 6.91x10 <sup>-02</sup> (1.20x10 <sup>-02</sup> ) | 6.35x10 <sup>-02</sup> (2.52x10 <sup>-02</sup> ) | 3.05x10 <sup>-02</sup> |
| Acetone                | 4.02x10 <sup>-03</sup> (4.55x10 <sup>-03</sup> ) | 1.40x10 <sup>-02</sup> (1.58x10 <sup>-02</sup> ) | 3.42x10 <sup>-02</sup> |
| Uracil                 | 5.84x10 <sup>-03</sup> (1.55x10 <sup>-03</sup> ) | 7.12x10 <sup>-03</sup> (1.92x10 <sup>-03</sup> ) | 4.31x10 <sup>-02</sup> |
| Phenylalanine          | 1.76x10 <sup>-02</sup> (2.38x10 <sup>-03</sup> ) | 2.09x10 <sup>-02</sup> (5.70x10 <sup>-03</sup> ) | 4.48x10 <sup>-02</sup> |
| Succinate              | 8.13x10 <sup>-03</sup> (4.60x10 <sup>-03</sup> ) | 1.67x10 <sup>-02</sup> (7.65x10 <sup>-03</sup> ) | 4.76x10 <sup>-02</sup> |



**Table S14. Mean concentration in mmol/L (sd) of extracellular metabolites significantly different between SAP producers (P) and non-producers (N).**

|                 | N                                                 | P                                                 | p-value                |
|-----------------|---------------------------------------------------|---------------------------------------------------|------------------------|
| Arabinitol      | 9.18x10 <sup>-01</sup> (1.63x10 <sup>+00</sup> )  | 1.94x10 <sup>+00</sup> (1.26x10 <sup>+00</sup> )  | 1.69x10 <sup>-04</sup> |
| Valine          | -1.12x10 <sup>-02</sup> (4.78x10 <sup>-02</sup> ) | -3.11x10 <sup>-02</sup> (2.81x10 <sup>-02</sup> ) | 8.75x10 <sup>-03</sup> |
| Inosine         | 1.14x10 <sup>-03</sup> (4.15x10 <sup>-03</sup> )  | -4.61x10 <sup>-05</sup> (2.47x10 <sup>-03</sup> ) | 1.10x10 <sup>-02</sup> |
| Malate          | -3.67x10 <sup>-03</sup> (5.13x10 <sup>-02</sup> ) | -2.90x10 <sup>-02</sup> (3.02x10 <sup>-02</sup> ) | 1.25x10 <sup>-02</sup> |
| Choline         | -1.80x10 <sup>-02</sup> (1.96x10 <sup>-02</sup> ) | -2.45x10 <sup>-02</sup> (8.68x10 <sup>-03</sup> ) | 1.60x10 <sup>-02</sup> |
| Sucrose         | 1.89x10 <sup>-02</sup> (8.65x10 <sup>-03</sup> )  | 1.34x10 <sup>-02</sup> (3.93x10 <sup>-03</sup> )  | 1.63x10 <sup>-02</sup> |
| Uracil          | 4.29x10 <sup>-03</sup> (6.39x10 <sup>-03</sup> )  | 5.15x10 <sup>-03</sup> (3.08x10 <sup>-03</sup> )  | 2.23x10 <sup>-02</sup> |
| Lactate         | 2.24x10 <sup>-02</sup> (6.68x10 <sup>-02</sup> )  | 4.14x10 <sup>-02</sup> (8.14x10 <sup>-02</sup> )  | 4.12x10 <sup>-02</sup> |
| Acetoin         | 9.76x10 <sup>-02</sup> (1.55x10 <sup>-01</sup> )  | 2.09x10 <sup>-01</sup> (7.73x10 <sup>-02</sup> )  | 4.20x10 <sup>-02</sup> |
| N6-Acetyllysine | -6.07x10 <sup>-02</sup> (4.15x10 <sup>-02</sup> ) | -4.29x10 <sup>-02</sup> (4.04x10 <sup>-02</sup> ) | 5.00x10 <sup>-02</sup> |

**Table S15. Mean concentration in mmol/L (sd) of intracellular metabolites significantly different between SAP producers (P) and non-producers (N).**

|           | N                                                 | P                                                | p-value                |
|-----------|---------------------------------------------------|--------------------------------------------------|------------------------|
| Threonine | 1.48 x10 <sup>-02</sup> (1.62x10 <sup>-02</sup> ) | 1.32x10 <sup>-02</sup> (7.85x10 <sup>-03</sup> ) | 2.02x10 <sup>-02</sup> |
| Valine    | 2.65x10 <sup>-02</sup> (1.32x10 <sup>-02</sup> )  | 2.20x10 <sup>-02</sup> (1.16x10 <sup>-02</sup> ) | 4.63x10 <sup>-02</sup> |
| Pyruvate  | 2.45x10 <sup>-02</sup> (1.58x10 <sup>-02</sup> )  | 1.60x10 <sup>-02</sup> (1.41x10 <sup>-02</sup> ) | 4.79x10 <sup>-02</sup> |
